# Supplementary material for: Fabrication of the Rapid Self-Assembly Hydrogels Loaded with Luteolin: Their Structural Characteristics and Protection Effect on Ulcerative Colitis
Source: MDPI journal article supplement (doi:10.3390/foods13071105), 2024-04-04
Supplement: s1 [file s1]

# Supporting Information

**Table.S1. Disease Activity Index Scoring Criteria**

| Weight<br>loss    | Fecal hardness     | Fecal bleeding                          | Vigor, fur,<br>postural behavior | Score |
|-------------------|--------------------|-----------------------------------------|----------------------------------|-------|
| no weight<br>loss | normal             | no obvious<br>bleeding                  | normal                           | 0     |
| 0.1-5%            | loose stools       | a little blood in the<br>feces          | slightly poor<br>condition       | 1     |
| 5-10%             | mild diarrhea      | blood was often<br>seen in<br>the feces | moderately poor<br>condition     | 2     |
| ≥10%              | severe<br>diarrhea | all feces were<br>bloody                | Seriously poor<br>condition      | 3     |

**Table.S2. Specific Primer Sequences for RT-qPCR Analysis**

| Genes           | Forward (5'-3')            | Reverse (5'-3')            |
|-----------------|----------------------------|----------------------------|
| ZO-1            | 5'-CCAGAGCCTCAGAAACCTCA-3' | 5'-GCAGGAAGATGTGCAGAAGG-3' |
| Occludin        | 5'-GCGGAAAGAGTTGACAGTCC-3' | 5'-TGCCTGAAGTCATCCACACT-3' |
| Claudin-1       | 5'-ACGGTCTTTGCACTTTGGTC-3' | 5'-GGGAGAGGAGAAGCACAGTT-3' |
| <i>β</i> -actin | 5'-ATCACTATTGGCAACGAGCG-3' | 5'-TCAGCAATGCCTGGGTACAT-3' |

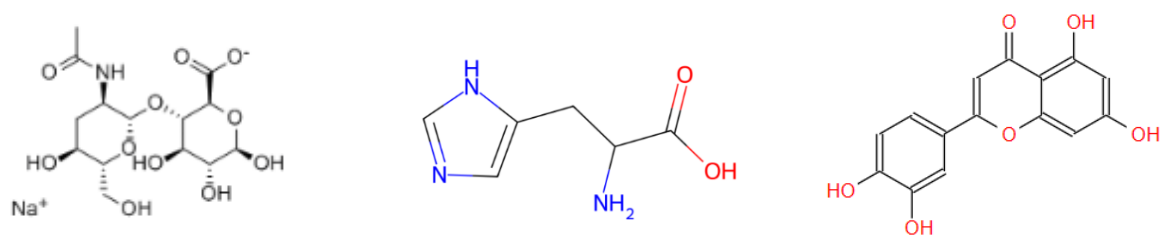

**Figure S1. The structural information of HA, His and LUT.**

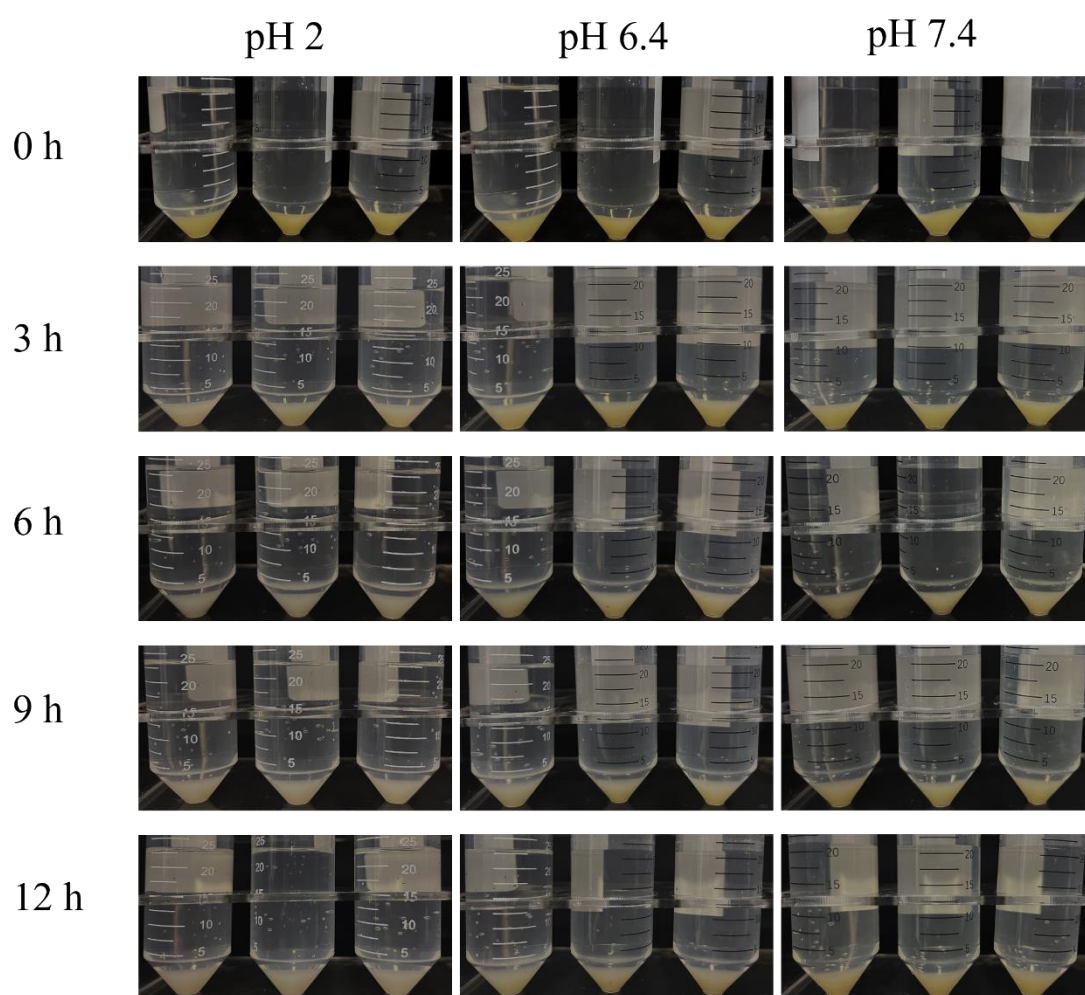

**Figure S2. The pH stability of HHL hydrogels.**

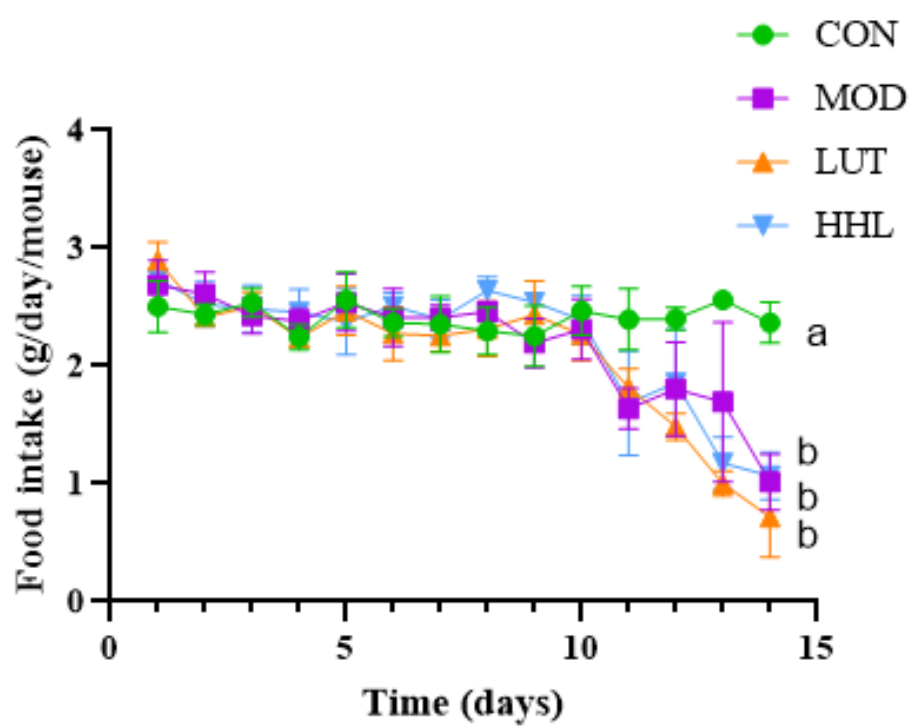

Figure S3. The food intake during animal experiments

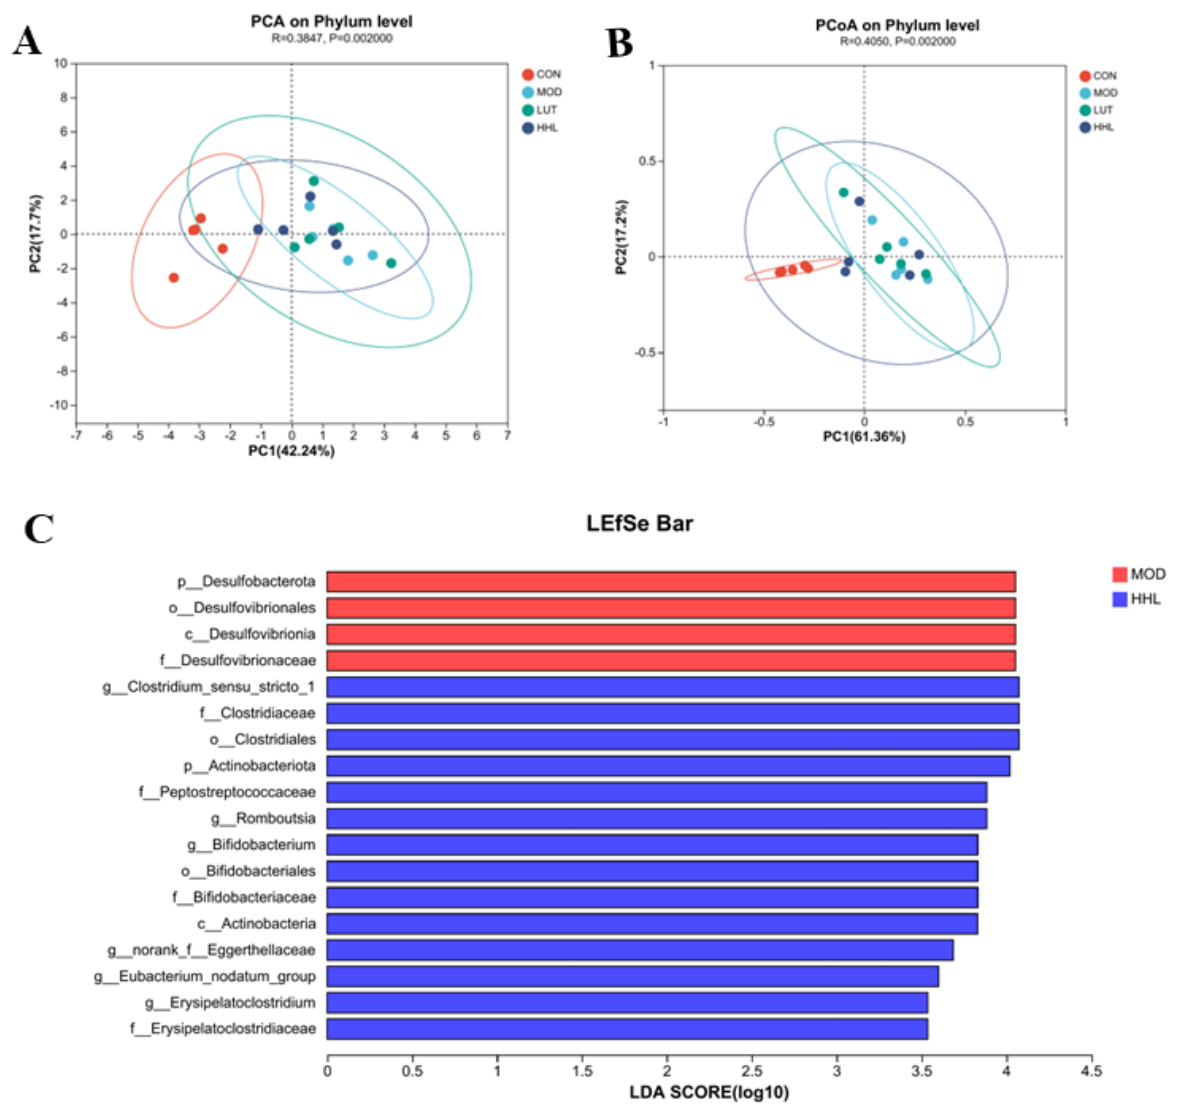

**Figure S4.** Gut microbiota composition and differential species analysis of DSS induced colitis mice treated with HHL hydrogel. (A) PCA analysis. (B) PCoA analysis. (C) LDA score.
